# Supplementary material for: Design of hepatocyte-targeted gene transfer vector and its in vitro transfer of tumor-suppressor p53 gene
Source: Royal Society of Chemistry journal article supplement (doi:10.1039/c0jm03618h), 2011-01-01
Supplement: c0jm03618h.pdf [file c0jm03618h.pdf]

## Supporting Information

*of*

# Design of Hepatocyte-targeted Gene Transfer Vector and Its in vitro Transfer of Tumor-suppressor p53 Gene

Fu-Wei Huang,<sup>a</sup> Jin Yang,<sup>b</sup> Jun Feng<sup>a,\*</sup> Ren-Xi Zhuo,<sup>a</sup> Xian-Zheng Zhang<sup>a,\*</sup>

<sup>a</sup> Key Laboratory of Biomedical Polymers of Ministry of Education & Department of Chemistry, Wuhan University. Wuhan 430072, P. R. China.

<sup>b</sup> State Key Laboratory of Virology, College of Pharmacy, Wuhan University. Wuhan 430072, P. R. China.

---

\* Corresponding authors.

Emails: fengjun@whu.edu.cn (J. Feng) or xz-zhang@whu.edu.cn (X.Z. Zhang). Tel: +86 27 68753990, Fax: +86 27 68754059.

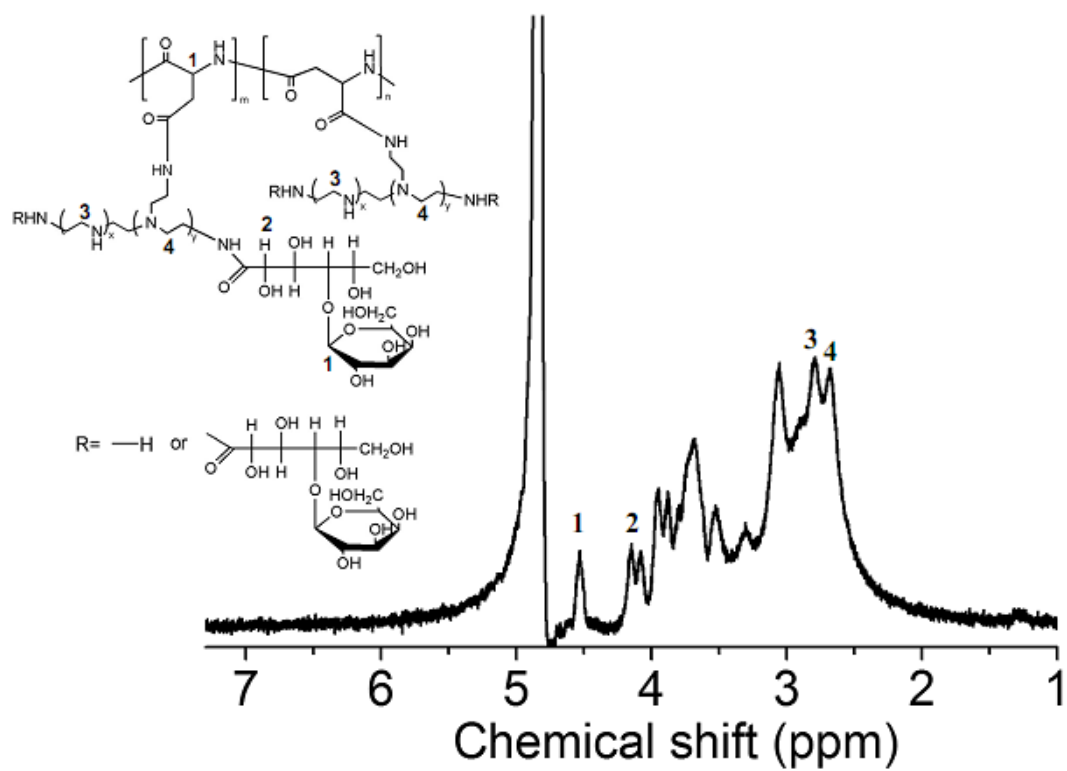

**Figure S1.**  $^1\text{H}$  NMR spectrum of PSI-g-PEI-g-LA in  $\text{D}_2\text{O}$ .

### Acid–base titration

The buffer capabilities of polymers were examined by acid-base titrations over the pH range from 10.43 to 2.67. Briefly,  $0.2 \text{ mg}\cdot\text{mL}^{-1}$  sample solution was prepared in 30 mL of  $150\times 10^{-3} \text{ M}$  NaCl solution before titration. The sample solution was firstly titrated with 0.1 M NaOH to pH 10.43. HCl solution (0.1 M) was then gradually added to the solution. During the titration process, the solution pH was monitored simultaneously by a microprocessor pH meter. Data were shown as mean  $\pm$  standard deviation (SD) based on triplicate independent experiments.

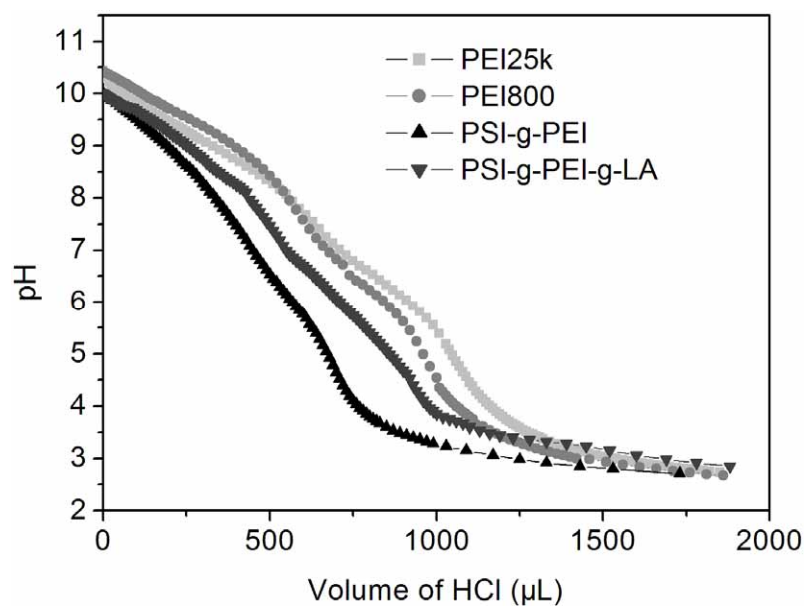

**Figure S2.** Acid-base titration profiles of PEI25k, PEI800, PSI-g-PEI and PSI-g-PEI-g-LA in 0.15M NaCl. Data were shown as mean  $\pm$  SD (n=3).

### Agarose gel retardation assay

PSI-g-PEI/pEGFP-C1 and PSI-g-PEI-g-LA/pEGFP-C1 complexes at different W/W ratios (weight ratio of polymer relative to pDNA) ranging from 0.0625:1 to 4:1 were prepared by adding appropriate volume of the polymer solution (in  $150 \times 10^{-3}$  M NaCl solution) to 1.3  $\mu\text{L}$  of pEGFP-C1 solution ( $80 \text{ ng} \cdot \mu\text{L}^{-1}$  in  $40 \times 10^{-3}$  M Tris-HCl buffer solution). The obtained complex solution was then diluted by  $150 \times 10^{-3}$  M NaCl solution to the total volume of 5  $\mu\text{L}$  and incubated at 37 °C for 0.5 h. After 1  $\mu\text{L}$  of GelRed™ was added to the complexes, the incubated complexes were electrophoresed on a 0.7% agarose gel which was put in Tris-acetate (TAE) running buffer at 80 V for 1.2 h. DNA was visualized under an ultraviolet lamp with a Vilber Lourmat imaging system.

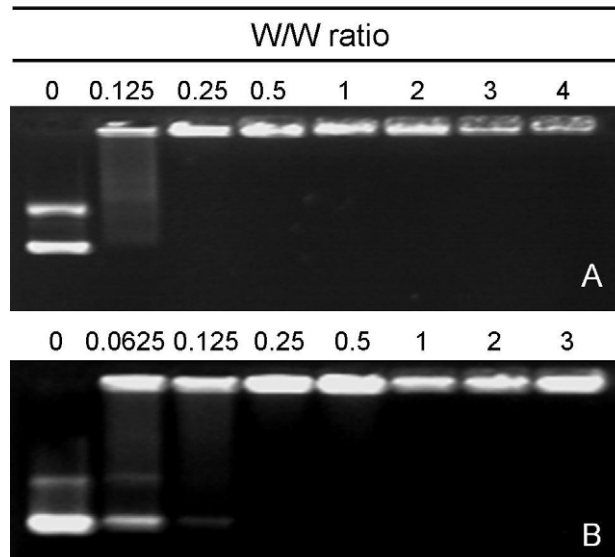

**Figure S3.** Agarose gel electrophoresis retardation assay of PSI-g-PEI (A) and PSI-g-PEI-g-LA (B). Plasmid DNA (pEGFP-C1) was mixed with the polymers at different W/W ratios.
